# Supplementary material for: Omnidirectional diffusion of organic amine salts assisted by ordered arrays in porous lead iodide for two-step deposited large-area perovskite solar cells
Source: Royal Society of Chemistry journal article supplement (doi:10.1039/d2ee03418b), 2023-01-01
Supplement: d2ee03418b1.pdf [file d2ee03418b1.pdf]

## 1 Supporting Information

2

3

### 4 **Omnidirectional Diffusion of Organic Amine Salts Assisted by Ordered Arrays in Porous Lead** 5 **Iodide for Two-Step Deposited Large-Area Perovskite Solar Cells**

6

7 Jiacheng He, Wangping Sheng, Jia Yang, Yang Zhong, Yang Su, Licheng Tan<sup>\*ac</sup>, Yiwang Chen<sup>\*abc</sup>

8

9 Author contributions. J. H. and W. S. contributed equally to this work.

10 J. He, W. Sheng, J. Yang, Y. Zhong, Y. Su, Prof. L. Tan, Prof. Y. Chen

11 <sup>a</sup>College of Chemistry and Chemical Engineering/Institute of Polymers and Energy Chemistry (IPEC),  
12 Nanchang University, 999 Xuefu Avenue, Nanchang 330031, China

13 Prof. Y. Chen

14 <sup>b</sup>National Engineering Research Center for Carbohydrate Synthesis/Key Lab of Fluorine and Silicon  
15 for Energy Materials and Chemistry of Ministry of Education, Jiangxi Normal University, 99 Ziyang  
16 Avenue, Nanchang 330022, China

17 Prof. L. Tan, Prof. Y. Chen

18 <sup>c</sup>Peking University Yangtze Delta Insititute of Optoelectronics, Nantong 226010, China

19 E-mail: ywchen@ncu.edu.cn (Y. C.); tanlicheng@ncu.edu.cn (L. T.)

20

## 21 **Experimental Section**

22 **Materials and Sample Preparation:** Unless specified, all chemicals are employed as received  
23 without further modifications after purchase. Tin(IV) oxide (SnO<sub>2</sub>, 15% in H<sub>2</sub>O colloidal dispersion  
24 liquid), isopropanol (99.7% purity) and lead iodide (PbI<sub>2</sub>, 99.999%) were purchased from Alfa Aesar.  
25 N,N-dimethylformamide (DMF, 99.8%), dimethyl sulfoxide (DMSO, anhydrous, ≥99.9%),  
26 chlorobenzene (CB, 99.8%), acetonitrile (99.8%), 4-tert-butyl pyridine (tBP),  
27 bis(trifluoromethane)sulfonimide lithium salt (Li-TSFI, 99.95%) were purchased from Sigma-Aldrich.  
28 Formamidinium iodide (FAI, 99.8%), methylamine iodide (MAI, 99.5%), methylamine hydrochloride  
29 (MACI, 99.5%) were purchased from Xi'an Polymer Light Technology Corp. 2,2',7,7'-tetrakis(N,N-di-  
30 p-methoxyphenylamine)-9,9-spirobifluorene (Spiro-OMeTAD, 99.5%) was purchased from  
31 Luminescence Technology Corp. Succinamide (SA, >98% ) was purchased from  
32 TCI(Shanghai)Development Co., Ltd.

33

34 **Perovskite Precursor Preparation:**  $\text{PbI}_2$  (691.5 mg, 1.5 mmol/mL) was dissolved in DMF/DMSO  
35 (95:5) and stirred at 60 °C for 6 h for the pristine  $\text{PbI}_2$  precursor solutions. For the SA- $\text{PbI}_2$  precursor  
36 solutions, 5 mg succinamide was dissolved into 1 ml DMSO solutions, then  $\text{PbI}_2$  (691.5 mg, 1.5  
37 mmol/mL) was dissolved in DMF/DMSO with succinamide (95:5) and stirred at 60 °C for 6 h for the  
38 SA- $\text{PbI}_2$  precursor solutions. The organic amine salts solution, FAI, MAI, MACI were dissolved in 2-  
39 propanol with a concentration of 90, 6.4, and 9 mg mL<sup>-1</sup>, respectively. The Spiro-OMeTAD solution  
40 was prepared with a concentration of 72.3 mg mL<sup>-1</sup> in chlorobenzene, in which 28.8 μL of 4-tert-  
41 butylpyridine and 17.5 μL of lithium (trifluoromethylsulfonyl)-imide (520 mg mL<sup>-1</sup> in acetonitrile)  
42 were added as additives. It should be noted that both the  $\text{PbI}_2$  and organic amine salt solutions need  
43 to be fresh.

44

45 **PVSCs Fabrication and Characterization:** First, the indium tin oxide (ITO) glasses were cleaned by  
46 sequentially washing with detergent, deionized (DI) water, acetone and isopropanol (IPA) for 20 min  
47 then dried with a nitrogen ( $\text{N}_2$ ) stream followed by air plasma treatment for 5 min before use. The  
48 uniform and dense  $\text{SnO}_2$  layer was deposited onto an ITO substrate by spin-coating  $\text{SnO}_2$   
49 nanoparticle solution (Alfa Aesar, tin(IV) oxide, 15% in  $\text{H}_2\text{O}$  colloidal dispersion,  $\text{SnO}_2$  colloidal  
50 solution/DI water, a ratio of 1:3) at 3000 rpm for 30 s, and annealed in ambient air at 150 °C for 30  
51 min. Then treated in a plasma cleaning machine for 6 min. After that, 62 μL of the  $\text{PbI}_2$  and SA- $\text{PbI}_2$   
52 precursor solutions were spin-coated onto  $\text{SnO}_2$  at 1500 r.p.m. for 30 s, then annealed at 70 °C for  
53 1 min, and then cooled to room temperature. For the imprinted with SA, after SA- $\text{PbI}_2$  precursor  
54 solutions were spin-coated onto  $\text{SnO}_2$  at 1500 r.p.m. for 30 s, a silicon cylinder array stamp is placed  
55 on the  $\text{PbI}_2$  with moderated pressure (3 MPa) applying on it and heat treatment 70 °C for 1 min, the  
56 silicon cylinder array stamp was removed. Subsequently, 75 μL of the (FAI/MAI/MACI) organic amine  
57 salt solution was spin-coated on the top of the  $\text{PbI}_2$  layer at 2000 rpm for 30 s, followed by thermal  
58 annealing at 150 °C for 15 min. After the films were cooled down to room temperature, spiro-  
59 OMeTAD solution was spin-coated on perovskite films at 4000 rpm for 30 s. Finally, a 100 nm Ag  
60 anode was deposited by thermal evaporation (rate of 1.0 Å s<sup>-1</sup>) using a metal shadow mask. The  
61 device area was 0.04 cm<sup>2</sup>. All devices' measurements were carried out in drying cabinet at room  
62 temperature.

63

64 **Fabrication of perovskite solar module:** All layers except the spiro-OMeTAD and metal electrodes  
65 were prepared in a low humidity air environment (<10% RH). Glass/ITO were ultrasonically cleaned  
66 with acetone, deionized water, and isopropyl alcohol for 20 min, and then blown dry by nitrogen  
67 ( $N_2$ ) and treated with air plasma for 10 min. Then, a ~20 nm  $SnO_2$  film was fabricated by meniscus-  
68 printing (the blading speed is 10 mm/s and the distance between meniscus and substrate is 50  $\mu m$ ).  
69 And the heating temperature was 50  $^{\circ}C$ . After that, the  $SnO_2$  coated substrates were annealed at  
70 150  $^{\circ}C$  for 30 min in air. A certain amount of SA-PbI<sub>2</sub> precursor solution (generally 75  $\mu L$  for 5 $\times$ 5 cm<sup>2</sup>  
71 substrate ) was dripped into the gap (about 0.15 mm) between the blade coater and substrate, the  
72 horizontal movement of blade coater was controlled by the computer with the speed of 15 mm/s.  
73 A silicon cylinder array stamp was placed on the PbI<sub>2</sub> with moderated pressure (3 MPa) applying on  
74 it and heat treatment 70  $^{\circ}C$  for 1 min, the silicon cylinder array stamp was removed. After the  
75 substrate cooled down to room temperature, the mixture solution of FAI: MAI: MACl (90 mg: 6.4  
76 mg: 9 mg in 1 mL IPA) was bladed onto the PbI<sub>2</sub> films (generally 100  $\mu L$  for 5 $\times$ 5 cm<sup>2</sup> ), then annealed  
77 at 150  $^{\circ}C$  for 15 min for perovskite crystallization. The spiro-OMeTAD/CB solution (72.3 mg/mL) is  
78 prepared by adding 28.8  $\mu L$  4-tertbutylpyridine, 17.5  $\mu L$  Li-TFSI/acetonitrile solution (520 mg/mL).  
79 The gap between blade and substrate is fixed at 50-100  $\mu m$  and the blading speed is fixed at 5 mm/s.  
80 Finally, about 100 nm of silver is deposited on the top of films by inkjet printing (DMP-2831-  
81 Fujifilm). The solar module consisted of 6 sub-cells and the size of a single cell is 2.93 cm<sup>2</sup> (0.45 cm  $\times$   
82 6.5 cm), respectively.

83

84 **Device Characterizations:** Current density-voltage ( $J$ - $V$ ) characteristics were measured using a  
85 source meter (Keithley 2400), equipped with a light source (100 mW/cm<sup>2</sup>) under AM 1.5 G  
86 irradiation (Abet5 Solar Simulator Sun2000). The standard silicon solar cell was corrected from NREL  
87 and the currents were detected under the solar simulator (Enli Tech, 100 mW cm<sup>-2</sup>, AM 1.5 G  
88 irradiation). The forward scan range is from 0 V to 1.2 V and the reverse scan range is from 1.2 V to  
89 0 V and the scan rate for the  $J$ - $V$  measurement is 0.2 V/s. The <sup>1</sup>H nuclear magnetic resonance (<sup>1</sup>H-  
90 NMR) spectrum was conducted by BRUKER/AVANCE NEO 300. The Ultraviolet-visible (UV-Vis)  
91 spectra were characterized on UV-2600 spectrophotometer (Agilent Technologies Inc. Cary 5000  
92 spectrophotometer). The steady-state photoluminescence (PL) spectra was recorded by

93 fluorescence spectrophotometer (Hitachi F-7000) and time-resolved photoluminescence (TRPL)  
94 spectra were measured by fluorescence lifetime system (Light-Stone Instruments NTAS-TCSPC). FTIR  
95 spectra were recorded on a Shimadzu IRPrestige-21 spectrometer. X-ray photoelectron  
96 spectroscopy (XPS) measurement was performed in an ESCALAB 250Xi, Thermo Fisher (by using Al  
97 K $\alpha$  X-ray source) under high vacuum ( $10^{-9}$  mbar) and the energy resolution was 450 meV. The  
98 samples were coated on the highly conductive ITO substrates. Scanning electron microscopy (SEM)  
99 was been conducted on SU8020 scanning electron microscope operated at an acceleration voltage  
100 of 5 kV. Atomic force microscopy (AFM) images have been obtained by MultiMode 8- HR (Bruker)  
101 atomic force microscope. X-ray diffraction (XRD) patterns were been performed by using Bruker  
102 D8Discover 25 X-ray diffractometer. Electrical impedance spectroscopy (EIS) of the devices has been  
103 performed in a frequency range from 1 MHz to 10 MHz using Zahner electrochemical workstation.  
104 Dark *J-V* characteristics of the devices were tested at room temperature or within a cryostat  
105 (HCS621G, Instec) by using a B1500A semiconductor analyzer (Keysight). The trap density of state  
106 (tDOS) was performed using Agilent 4294A. The water contact angle has been recorded at a Krüss  
107 DSA100s drop shape analyzer. External quantum efficiency (EQE) values were measured under  
108 monochromatic illumination (Oriel Cornerstone 260 1/4 m monochromator equipped with an Oriel  
109 70613NS QTH lamp), and the calibration of the incident light was performed using a monocrystalline  
110 silicon diode.

111

(a)

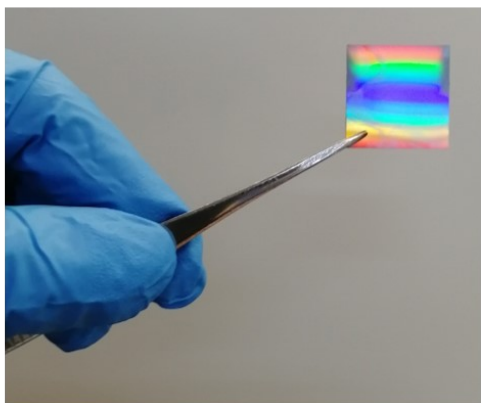

(b)

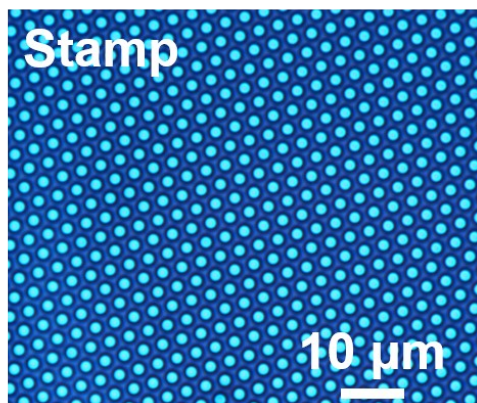

112

113 **Figure S1.** (a) Digital camera image of the silicon cylinder arrays stamp. It shows the visual effect of  
114 optical interference owing to the diffraction-grating structure. (b) Optical microscope image of  
115 silicon cylinder arrays stamp.

116

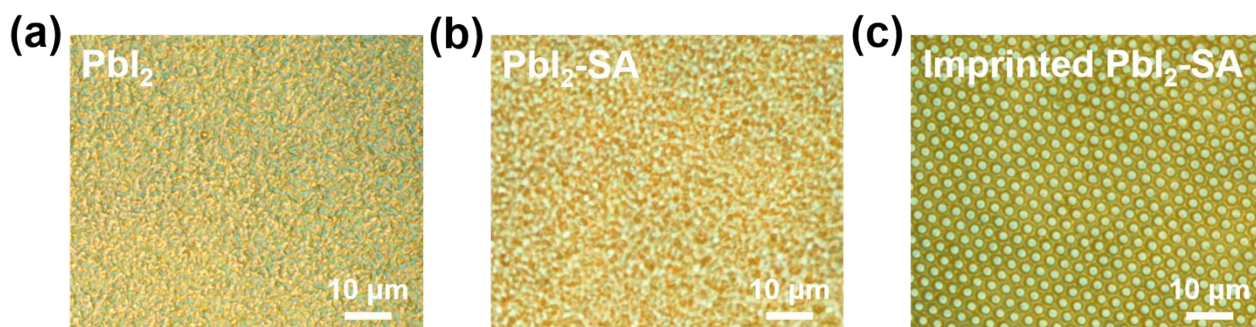

117  
118 **Figure S2.** Optical microscope images of (a) Pbl<sub>2</sub>, (b) Pbl<sub>2</sub>-SA and (c) imprinted Pbl<sub>2</sub>-SA films.

119

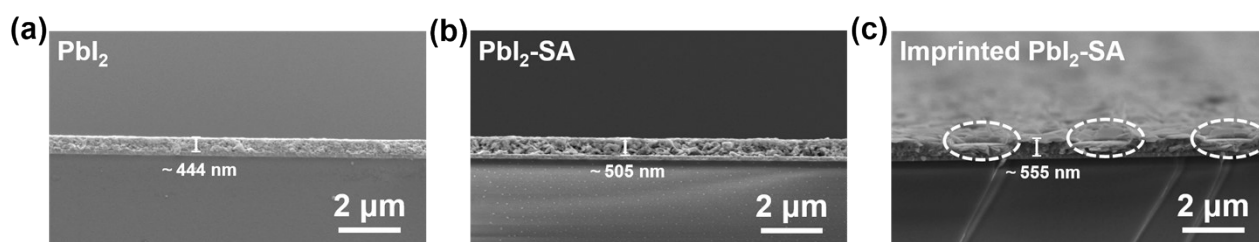

120  
 121 **Figure S3.** Cross-section SEM images of (a) Pbl<sub>2</sub>, (b) Pbl<sub>2</sub>-SA and (c) imprinted Pbl<sub>2</sub>-SA films.  
 122

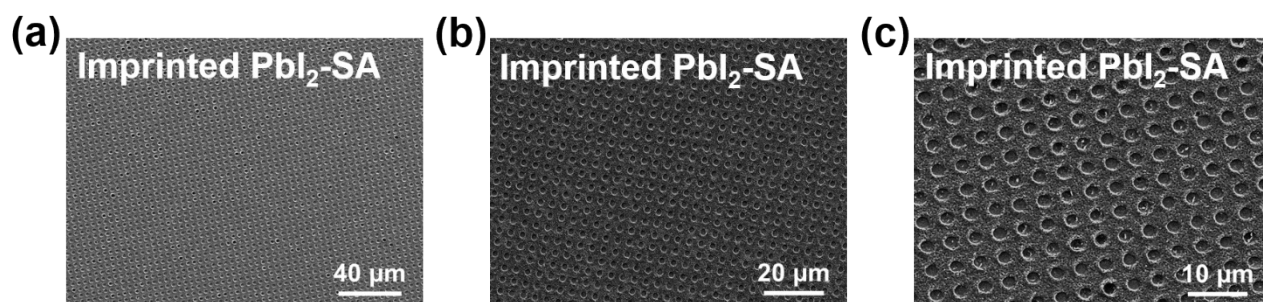

123

124 **Figure S4.** Top-view SEM images of imprinted  $\text{PbI}_2$ -SA films at different magnifications to verify  
125 uniformity.

126

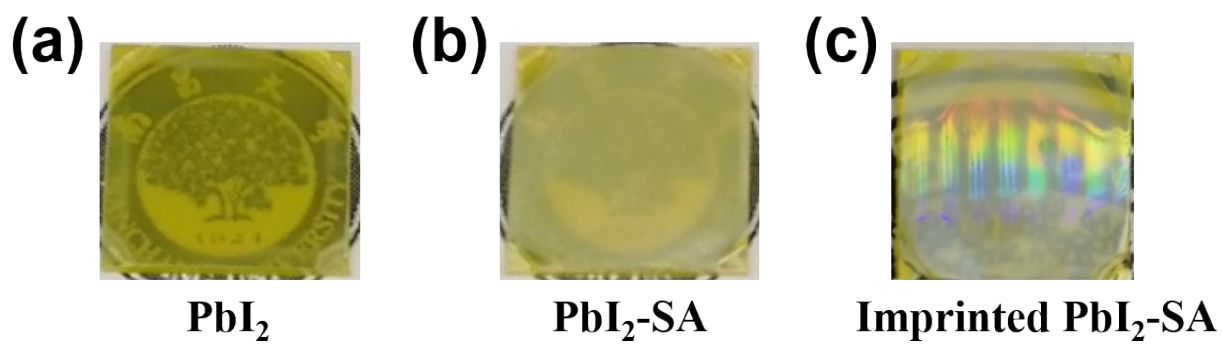

127

128 **Figure S5.** Photographs of (a) PbI<sub>2</sub>, (b) PbI<sub>2</sub>-SA and (c) imprinted PbI<sub>2</sub>-SA films.

129

(a)

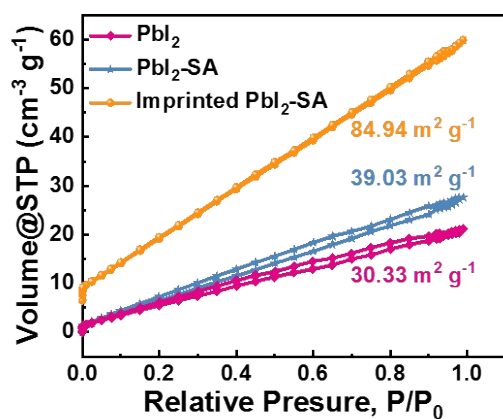

(b)

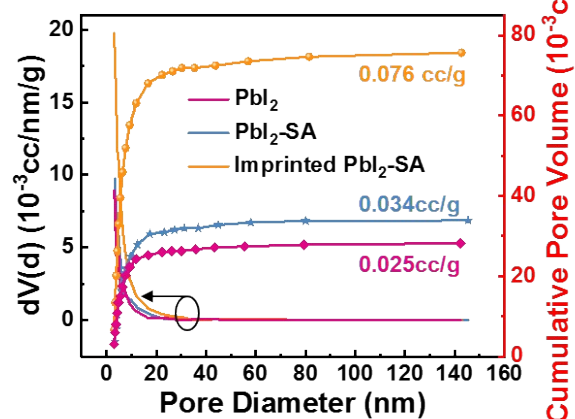

130

131 **Figure S6.** (a) Nitrogen adsorption and desorption isotherms, and (b) corresponding pore size  
132 distribution for Pbl<sub>2</sub>, Pbl<sub>2</sub>-SA and imprinted Pbl<sub>2</sub>-SA films.

133

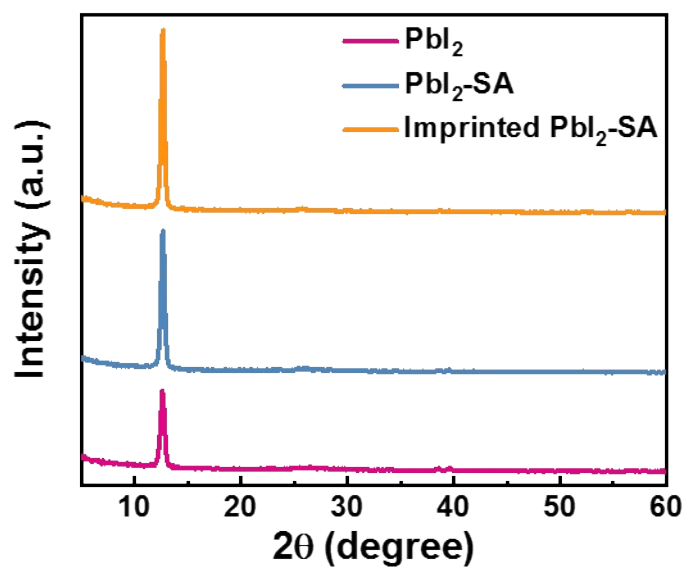

134

135 **Figure S7.** XRD patterns of Pbl<sub>2</sub>, Pbl<sub>2</sub>-SA and imprinted Pbl<sub>2</sub>-SA films.

136

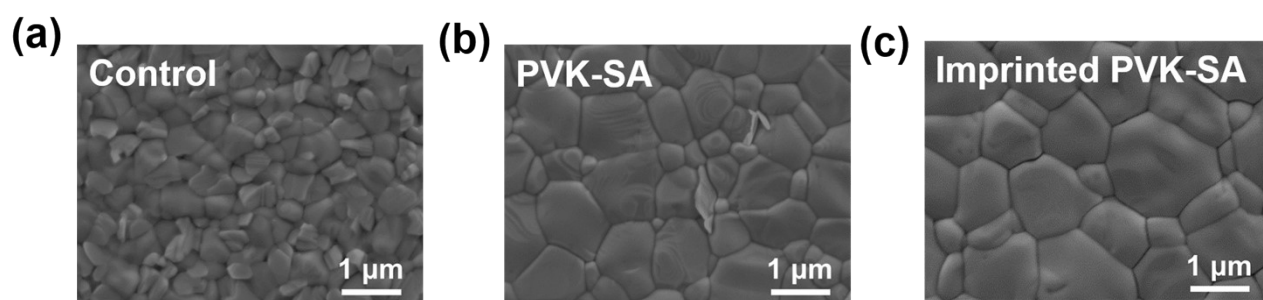

137  
138 **Figure S8.** Top view SEM images of control, PVK-SA and imprinted PVK-SA perovskite films.  
139

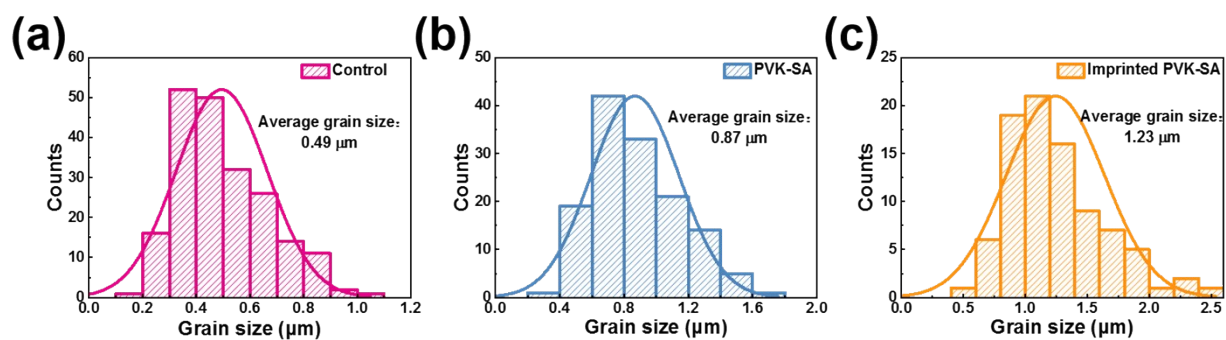

140

141 **Figure S9.** Grain size distributions extracted from SEM images of control, PVK-SA and imprinted PVK-  
 142 SA perovskite films.

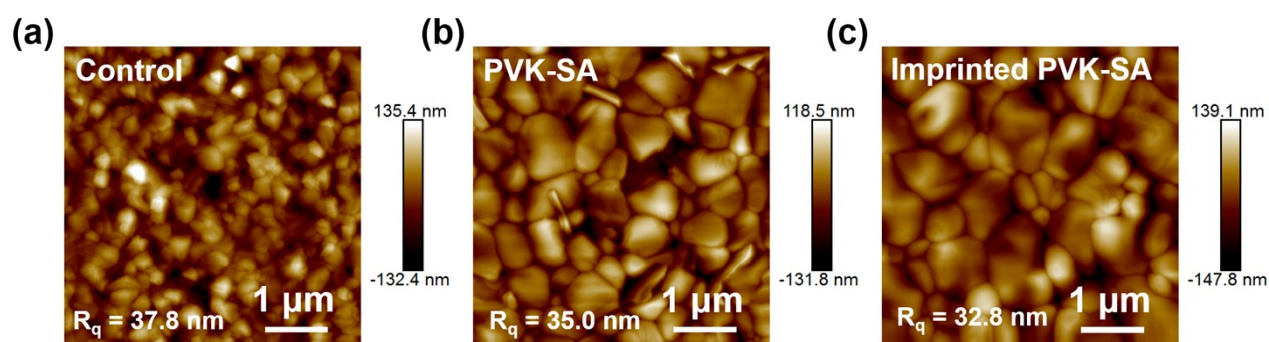

143

144 **Figure S10.** AFM images of control, PVK-SA and imprinted PVK-SA perovskite films.

145

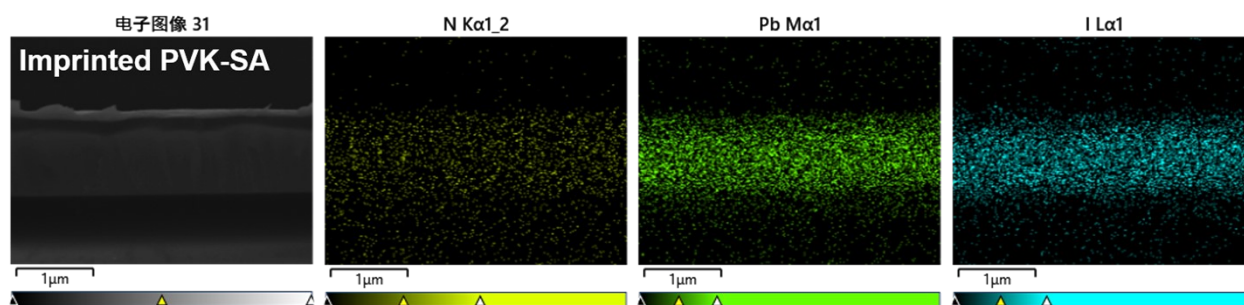

146

147 **Figure S11.** EDS mapping images of the imprinted PVK-SA perovskite film.

148

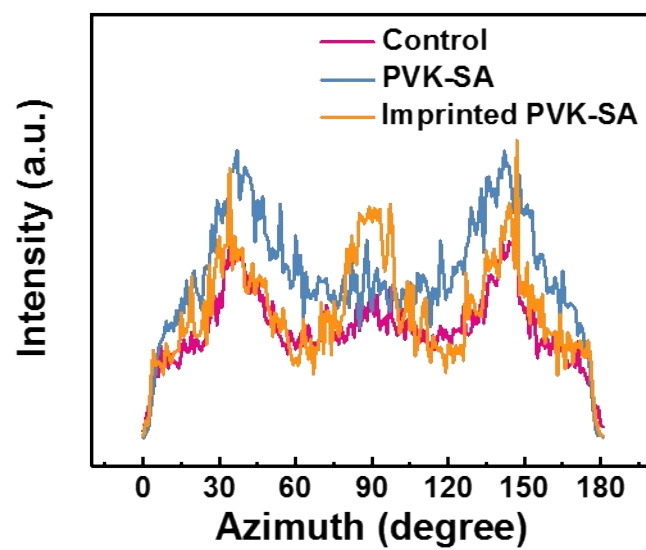

150

151 **Figure S12.** Radially integrated intensity plots along the ring at  $q = 1.0 \text{ \AA}^{-1}$ .

152

153

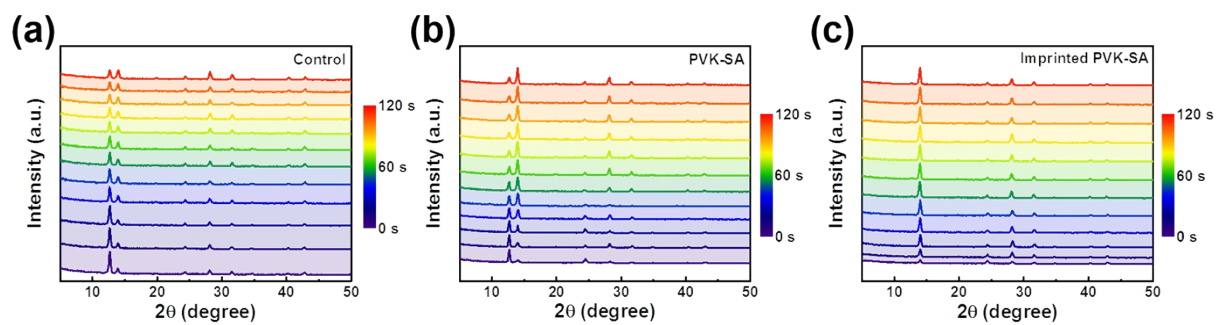

154

155 **Figure S13.** The semi-in situ XRD patterns of control, PVK-SA and imprinted PVK-SA perovskite films  
156 annealing at 150 °C on the ITO/glass substrate.

157

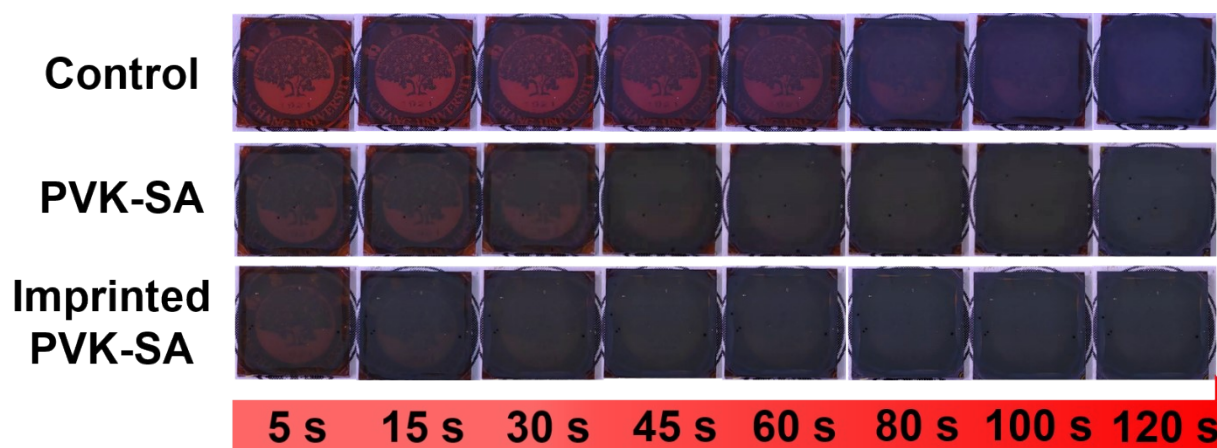

158

159 **Figure S14.** In-situ images of the control, PVK-SA and imprinted PVK-SA perovskite samples stored  
 160 in an ambient air (20% RH at 25 °C) for 120 s.

161

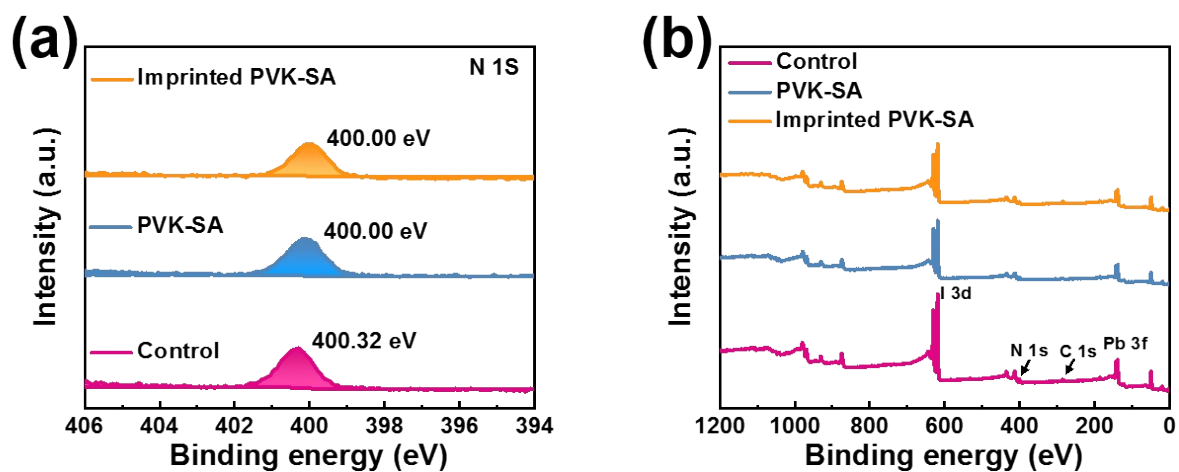

162

163 **Figure S15.** (a) XPS spectra N 1s in control, PVK-SA and imprinted PVK-SA perovskite films. (b) The

164 full XPS spectra of the perovskite films treatment in the range of 0 to 1200 eV binding energy.

165

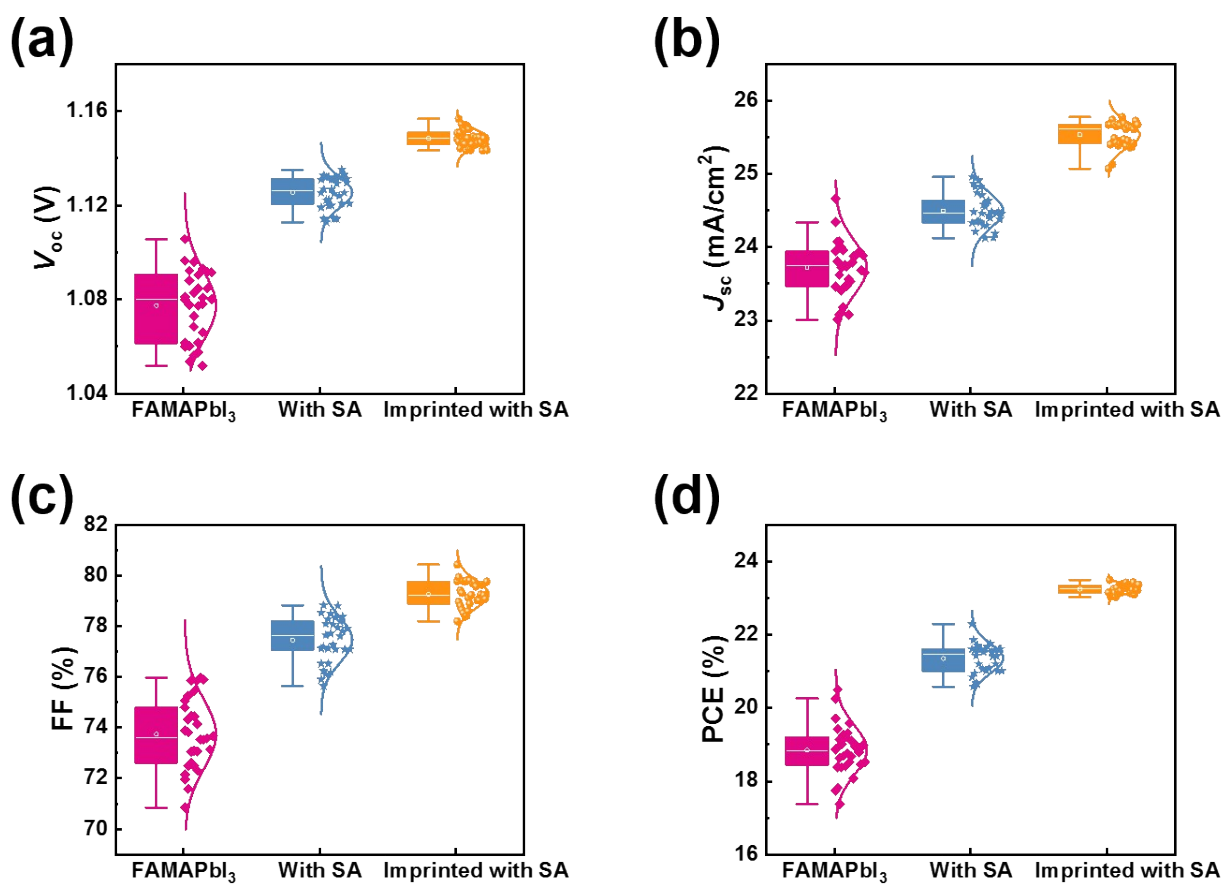

166

167 **Figure S16.** The statistical distribution of optoelectronic performance of control, PVK-SA and  
 168 imprinted PVK-SA perovskite devices, respectively. (a) Open circuit voltage. (b) Short-circuit current.  
 169 (c) Fill factor. (e) Power conversion efficiency.

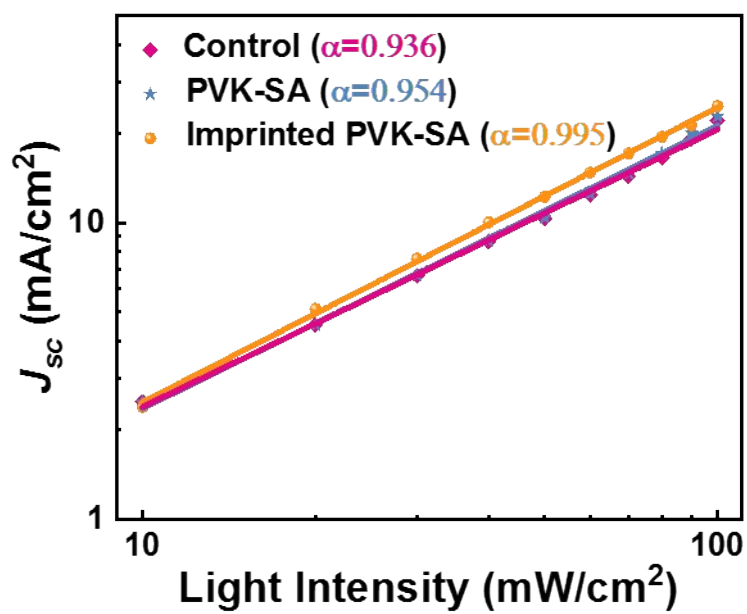

170

171 **Figure S17.**  $J_{sc}$  at various illumination intensities.

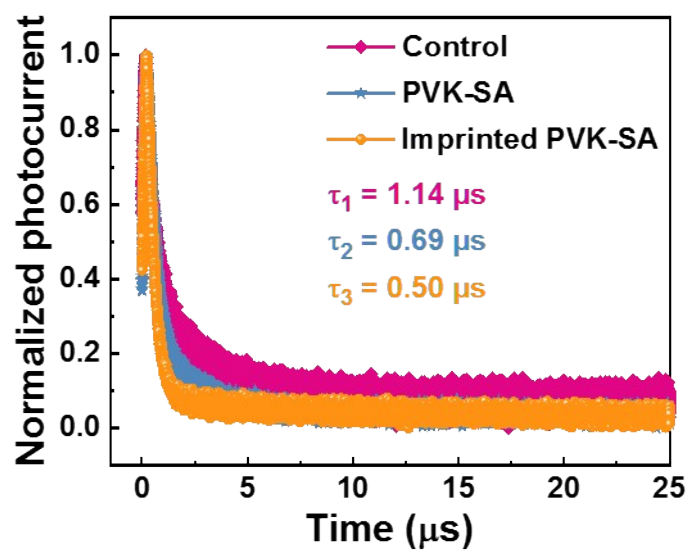

172

173 **Figure S18.** Transient photocurrent decay curves for control, PVK-SA and imprinted PVK-SA  
 174 perovskite devices, respectively.

175

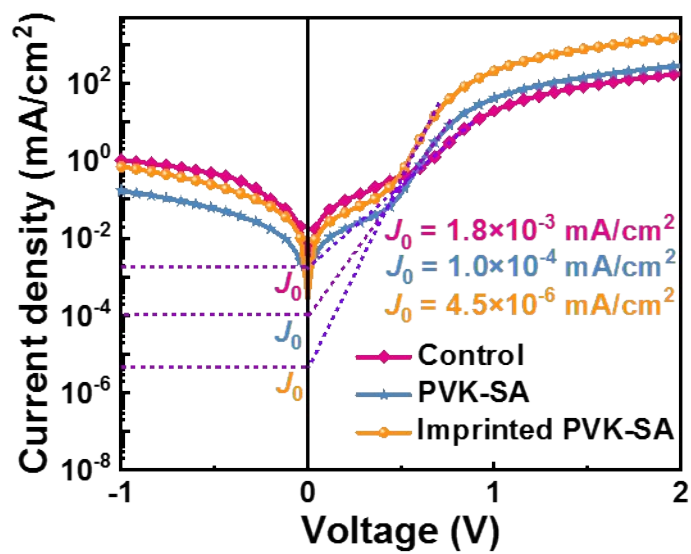

176

177 **Figure S19.** The dark current density-voltage ( $J$ - $V$ ) measurement of control, PVK-SA and imprinted

178 PVK-SA perovskite devices.

179

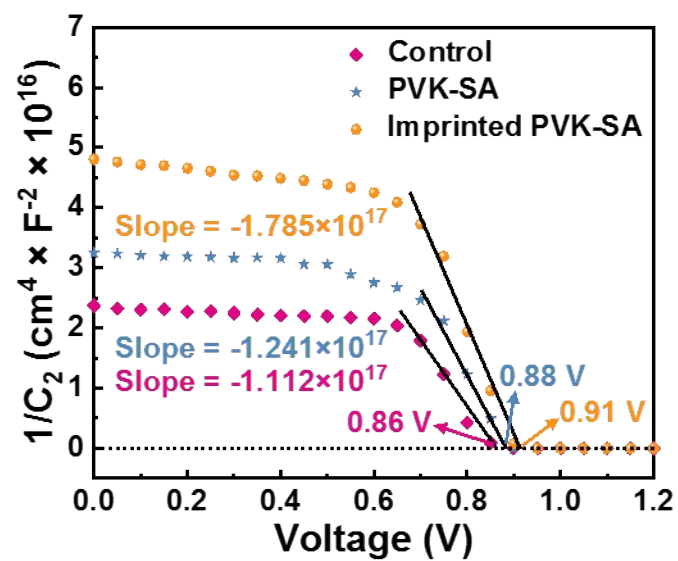

180

181 **Figure S20.**  $1/C^2$  versus applied voltage plots (Mott-Schottky) in the control, PVK-SA and imprinted

182 PVK-SA perovskite devices.

183

184

185

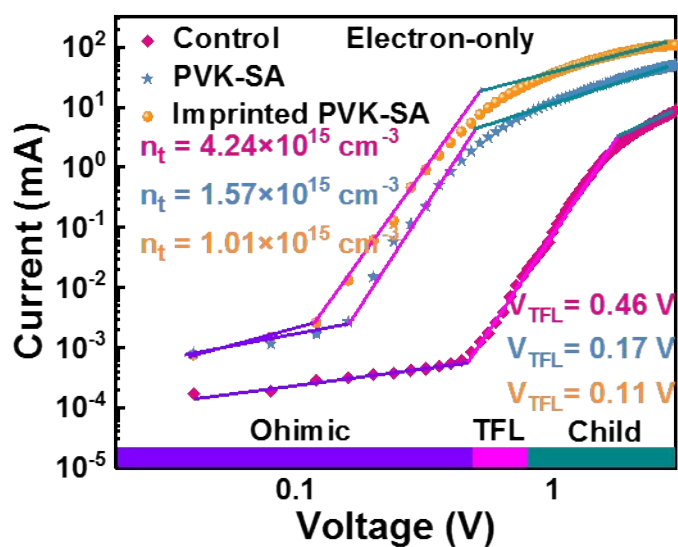

186

187 **Figure S21.** Space charge-limited current (SCLC) measurement of electron-only devices based on  
 188 control, PVK-SA and imprinted PVK-SA perovskite devices.

189

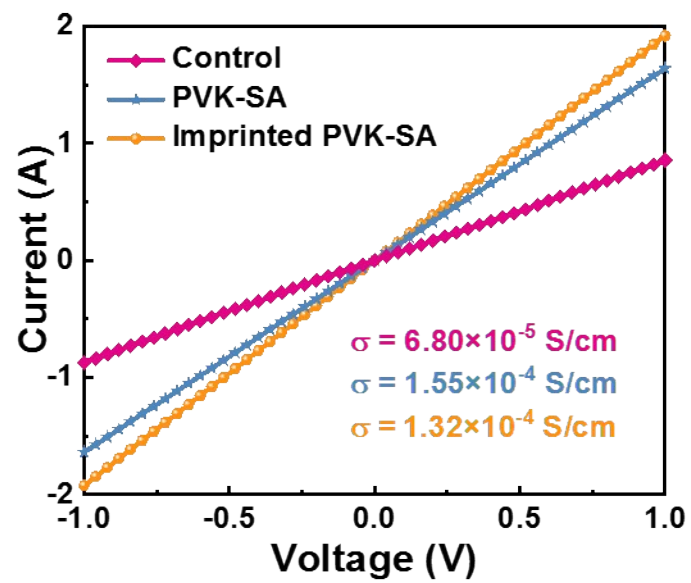

190

191 **Figure S22.** Vertical dark  $J$ - $V$  curve of ITO/FAMAPbI<sub>3</sub>/Ag.

192

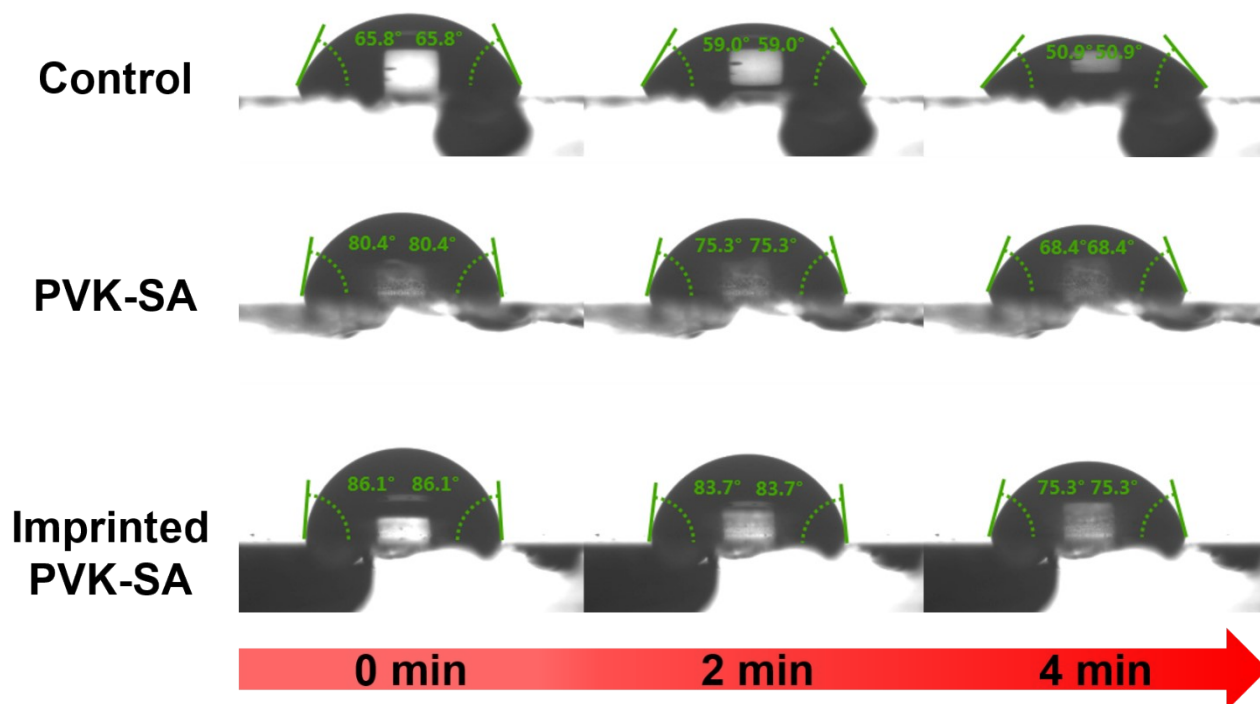

193

194 **Figure S23.** The dynamic contact angles on the surfaces of control, PVK-SA and imprinted PVK-SA

195 perovskite films, respectively.

196

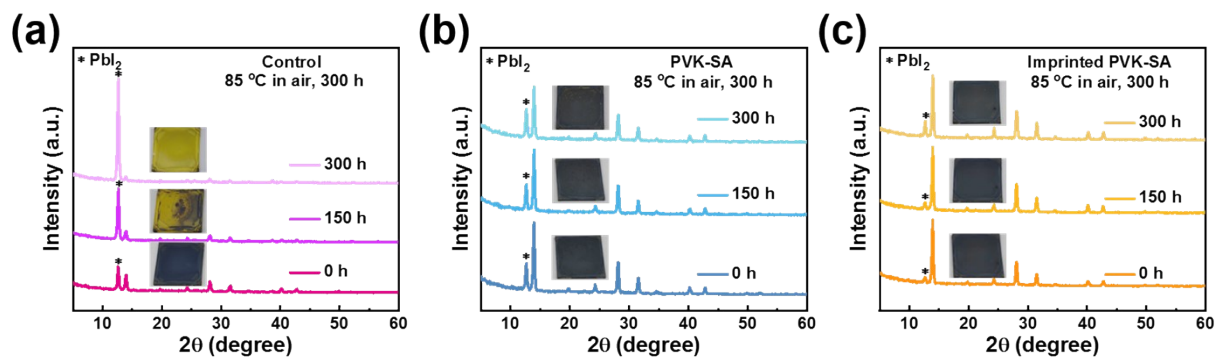

197

198 **Figure S24.** XRD patterns of control, PVK-SA and imprinted PVK-SA perovskite films deposited on

199 ITO/SnO<sub>2</sub> substrate heated at 85 °C in air for 300 h.

200

201 **Table S1.** The Brunauer-Emmett-Teller (BET) surface area and total pore volume for various  $\text{PbI}_2$   
 202 films.

| Sample                             | Surface area<br>( $\text{m}^2 \text{g}^{-1}$ ) | Single point surface area<br>( $\text{m}^2 \text{g}^{-1}$ ) | Total pore volume<br>( $\text{cc g}^{-1}$ ) |
|------------------------------------|------------------------------------------------|-------------------------------------------------------------|---------------------------------------------|
| $\text{PbI}_2$                     | 30.33                                          | 22.61                                                       | 0.025                                       |
| $\text{PbI}_2\text{-SA}$           | 39.03                                          | 27.64                                                       | 0.034                                       |
| Imprinted $\text{PbI}_2\text{-SA}$ | 84.94                                          | 73.65                                                       | 0.076                                       |

203

204 **Table S2.** The parameters of time-resolved photoluminescence measurement of control, PVK-SA  
 205 and imprinted PVK-SA perovskite films, respectively.

| Sample           | $\tau_1$ (ns) | $\tau_2$ (ns) | A     | B <sub>1</sub> (%) | B <sub>2</sub> (%) | $\tau_{ave}$ (ns) |
|------------------|---------------|---------------|-------|--------------------|--------------------|-------------------|
| Control          | 41.2          | 715.8         | 6.6   | 2.74               | 97.26              | 494               |
| PVK-SA           | 53.5          | 1463.1        | 71.1  | 0.86               | 99.14              | 1194              |
| Imprinted PVK-SA | 89.2          | 1979.1        | 119.7 | 0.27               | 99.73              | 1870              |

206

207 **Table S3.** A list of recently reported perovskite solar cells with high efficiency that fabricated with  
 208 two-step sequential deposition method.

| Perovskite type                       | $V_{oc}$ (V) | PCE (%)      | Ref              |
|---------------------------------------|--------------|--------------|------------------|
| $FA_{1-x}MA_xPbI_3$                   | 1.16         | 23.56        | [1]              |
| $FA_{1-x}MA_xPbI_3$                   | 1.148        | 22.35        | [2]              |
| $BA_xFA_yMA_zPbI_3$                   | 1.18         | 23.15        | [3]              |
| $FA_{1-x}MA_xPbBr_yI_{3-y}$           | 1.152        | 21.87        | [4]              |
| $FA_xCs_yMA_zPbI_3$                   | 1.06         | 21.5         | [5]              |
| FAPbI <sub>3</sub>                    | 1.116        | 22.04        | [6]              |
| FAPbI <sub>3</sub>                    | 1.182        | 25.6         | [7]              |
| $FA_{1-x}MA_xPbI_3$                   | 1.18         | 24.37        | [8]              |
| $(FAPbI_3)_x(MAPbI_3)_y$              | 1.12         | 22.53        | [9]              |
| <b><math>FA_{1-x}MA_xPbI_3</math></b> | <b>1.150</b> | <b>23.56</b> | <b>This work</b> |

209

210 **Table S4.** Space-limited charge current (SCLC) calculation results of the hole-only and electron-only  
 211 devices based on the control, PVK-SA and imprinted PVK-SA PVSCs, respectively.

| Devices          | Hole trap density (cm <sup>-3</sup> ) | Electron trap density (cm <sup>-3</sup> ) |
|------------------|---------------------------------------|-------------------------------------------|
| Control          | 5.90×10 <sup>15</sup>                 | 4.24×10 <sup>15</sup>                     |
| PVK-SA           | 3.13×10 <sup>15</sup>                 | 3.60×10 <sup>15</sup>                     |
| Imprinted PVK-SA | 1.10×10 <sup>15</sup>                 | 1.01×10 <sup>15</sup>                     |

213 **Table S5.** A list of recently reported 5 cm ×5 cm perovskite solar modules with high efficiency that  
 214 fabricated with two-step sequential deposition method.

| Perovskite type                                                          | $V_{oc}$ (V) | $J_{sc}$ [mA cm <sup>-2</sup> ] | FF [%] | PCE [%]      | Ref              |
|--------------------------------------------------------------------------|--------------|---------------------------------|--------|--------------|------------------|
| MAPbI <sub>3</sub>                                                       | 5.26         | 3.70                            | 66.11  | 12.86        | [10]             |
| FA <sub>1-x</sub> MA <sub>x</sub> PbI <sub>3</sub>                       | 6.19         | 2.62                            | 68.00  | 11.07        | [11]             |
| (FAPbI <sub>3</sub> ) <sub>1-x</sub> (MAPbBr <sub>3</sub> ) <sub>x</sub> | 6.71         | 3.47                            | 71.00  | 16.54        | [12]             |
| FAMAPbI <sub>3</sub>                                                     | 7.31         | 2.96                            | 67.23  | 14.55        | [13]             |
| <b>FA<sub>1-x</sub>MA<sub>x</sub>PbI<sub>3</sub></b>                     | <b>5.33</b>  | 4.51                            | 68.37  | <b>16.42</b> | <b>This work</b> |

215

## 216 References

- 217 [1] Q. Jiang, Y. Zhao, X. Zhang, X. Yang, Y. Chen, Z. Chu, Q. Ye, X. Li, Z. Yin, J. B. You, *Nat. Photon.*  
 218 **2019**, 13, 460.
- 219 [2] Y. P. Zhao, P. C. Zhu, S. Huang, S. Tan, M. H. Wang, R. Wang, J. J. Xue, T. H. Han, S. J. Lee, A.  
 220 Zhang, T. Y. Huang, P. Cheng, D. Meng, J. W. Lee, J. Marian, J. Zhu, Y. Yang, *J. Am. Chem. Soc.*  
 221 **2020**, 142, 20071
- 222 [3] H. K. Zhang, M. C. Qin, Z. L. Chen, W. Yu, Z. W. Ren, K. Liu, J. M. Huang, Y. K. Zhang, Q. Liang, H.  
 223 T. Chandran, P. W. K. Fong, Z. J. Zheng, X. H. Lu, G. Li, *Adv. Mater.* **2021**, 33, 2100009.
- 224 [4] Z.C. Lin, W. Q. Zhang, Q. B. Cai, X. N. Xu, H. Y. Dong, C. Mu, J. P. Zhang, *Adv. Sci.* **2021**, 8, 2102845.
- 225 [5] C. H. Chen, Y. H. Lou, K. L. Wang, Z. H. Su, C. Dong, J. Chen, Y. R. Shi, X. Y. Gao, Z. K. Wang, *Adv.*  
 226 *Energy Mater.* **2021**, 11, 2101538.
- 227 [6] J. He, H. L. Liu, F. Zhang, X. G. Li, S. R. Wang, *Adv. Funct. Mater.* **2022**, 32, 2110030
- 228 [7] Y. Zhao, F. Ma, Z. H. Qu, S. Q. Yu, T. Shen, H. X. Deng, X. B. Chu, X. X. Peng, Y. B. Yuan, X. W.  
 229 Zhang, J. B. You, *Science* **2022**, 377, 531.
- 230 [8] T. Zhou, Z. Y. Xu, R. Wang, X. Y. Dong, Q. Fu, Y. S. Liu, *Adv. Mater.* **2022**, 2200705.
- 231 [9] X. B. Zhang, W. C. Zhou, X. Q. Chen, Y. C. Chen, X. H. Li, M. Q. Wang, Y. Zhou, H. Yan, Z. L. Zheng,  
 232 Y. Z. Zhang, *Adv. Energy Mater.* **2022**, 2201105.
- 233 [10] F. Matteocci, L. Vesce, F. U. Kosasih, L. A. Castriotta, S. Cacovich, A. L. Palma, G. Divitini, C.  
 234 Ducati, A. D. Carlo, *ACS Appl. Mater. Interfaces* **2019**, 11, 25195.
- 235 [11] Z. Q. Huang, X. T. Hu, Z. Xing, X. C. Meng, X. P. Duan, J. Long, T. Hu, L. C. Tan, Y.W. Chen, *J. Phys.*  
 236 *Chem. C* **2020**, 124, 8129.
- 237 [12] J. W. Zhang, T. L. Bu, J. Li, H. Y. Li, Y. P. Mo, Z. L. Wu, Y. F. Liu, X. L. Zhang, Y. B. Cheng, F. Z.  
 238 Huang, *J. Mater. Chem. A* **2020**, 8, 8447.
- 239 [13] G. Q. Tong, D. Son, L. K. Ono, Y. Q. Liu, Y. Q. Hu, H. Zhang, A. Jamshaid, L. B. Qiu, Z. H. Liu, Y. B.  
 240 Qi, *Adv. Energy Mater.* **2021**, 11, 2003712.
